# Supplementary material for: Validation of a fully-coupled radiative transfer model for sea ice with albedo and transmittance measurements
Source: Copernicus journal article supplement (doi:10.5194/tc-2022-106), 2022-06-20

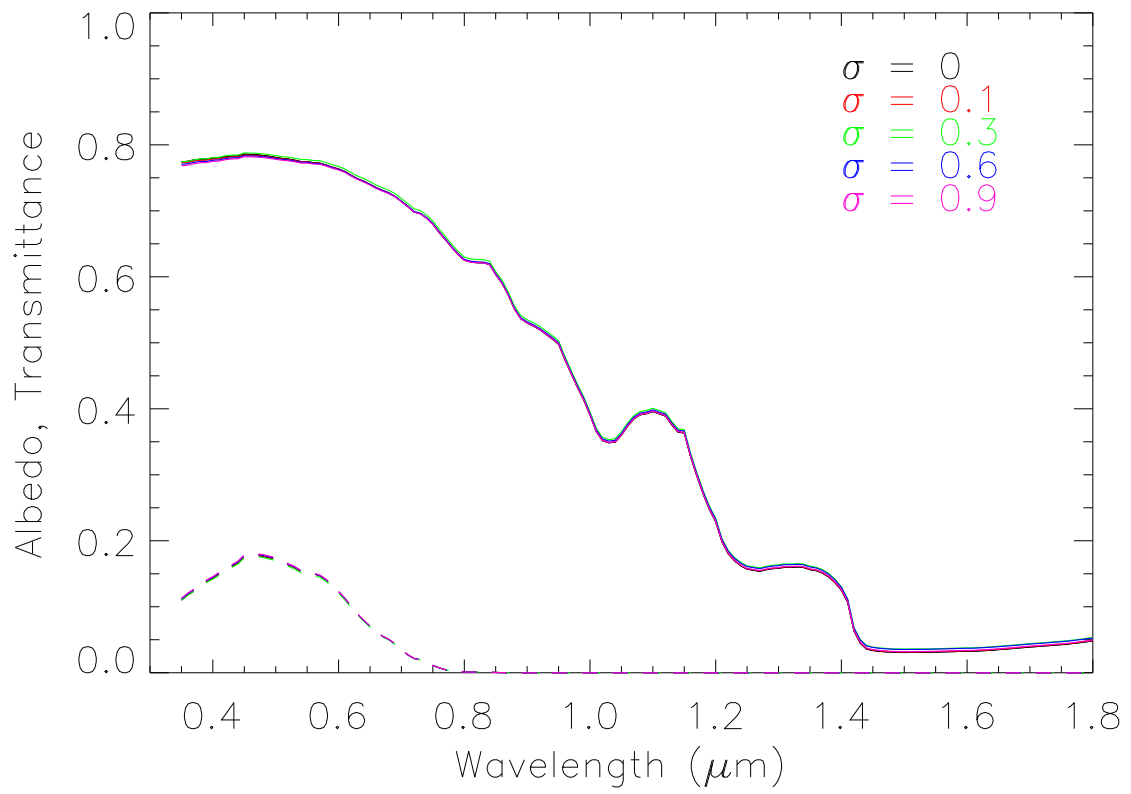

Supplement: Supplementary file [file tc-2022-106-AC1-supplement.pdf]
